# Supplementary material for: Fostering Sustainable Cooperation through Strategic Resource Allocation and Utilization on Social Networks
Source: Research Square preprint supplement (doi:10.21203/rs.3.rs-7121440/v1), 2025-10-24
Supplement: Supplementary file 1 [file 290288c2b1a37e67290fccea.pdf]

# **Supplementary Information: Fostering Sustainable Cooperation through Strategic Resource Allocation and Utilization on Social Networks**

Juyi Li<sup>1</sup>   Xiaoqun Wu<sup>2\*</sup>   Qi Su<sup>1†</sup>

<sup>1</sup>School of Automation and Intelligent Sensing, Shanghai Jiao Tong University, Shanghai, 200240, China

<sup>2</sup>School of Computer Science and Software Engineering, Shenzhen University, Guangdong, 518060, China

---

\*Correspondence: xqwu@whu.edu.cn

†Correspondence: qisu@sjtu.edu.cn

# Contents

|    |                                                                             |           |
|----|-----------------------------------------------------------------------------|-----------|
| 2  | <b>1 Model Description</b>                                                  | <b>3</b>  |
| 3  | 1.1 A framework of iterated multi-player games on hypergraphs . . . . .     | 3         |
| 4  | 1.2 Public goods games create social dilemmas . . . . .                     | 4         |
| 5  | 1.3 Repeated games . . . . .                                                | 5         |
| 6  | <b>2 Static equilibrium analysis</b>                                        | <b>7</b>  |
| 7  | 2.1 General condition for full cooperation . . . . .                        | 7         |
| 8  | 2.2 Linear symmetric payoff . . . . .                                       | 10        |
| 9  | 2.3 Linear asymmetric payoff . . . . .                                      | 15        |
| 10 | 2.4 An example of a nonlinear symmetric payoff . . . . .                    | 20        |
| 11 | 2.5 Maximally cooperative endowment distribution . . . . .                  | 24        |
| 12 | 2.6 Smallest continuation probability for homogeneous hypergraphs . . . . . | 25        |
| 13 | <b>3 Evolutionary Process Analysis</b>                                      | <b>30</b> |
| 14 | 3.1 Strategy update process . . . . .                                       | 30        |
| 15 | 3.2 Memory-one strategy . . . . .                                           | 30        |

16 This supplementary information provides a more detailed and comprehensive account of our  
17 analysis.

18 In Section 1, we present a novel framework of iterated multi-player games on hypergraphs to  
19 study repeated interactions in structured populations.

20 In Section 2, we extend the concept of the full cooperation feasible interval to hypergraphs.  
21 Specifically, we establish the necessary conditions for this concept to hold, and then, by exam-  
22 ining three representative types of payoff functions, we derive the sufficient conditions under  
23 which full cooperation is feasible. Furthermore, we theoretically determine the minimum con-  
24 tinuation probability threshold required to sustain full cooperation on any homogeneous hyper-  
25 graph.

26 In Section 3, we shift our focus to the evolution of player strategies and examine the conditions  
27 that promote full cooperation among players.

## 28 **1 Model Description**

### 29 **1.1 A framework of iterated multi-player games on hypergraphs**

30 This paper introduces a general framework to investigate repeated multi-player games on hy-  
31 pergraph. Specifically, we consider a population of  $N$  players, denoted by  $\mathcal{N} = \{1, 2, \dots, N\}$ ,  
32 engaged in  $M$  repeated games, indexed by  $\mathcal{M} = \{1, 2, \dots, M\}$ . The hypergraph is represented  
33 by an incidence matrix  $A = \{a_{ij}\} \in R^{N,M}$ , where  $a_{ij} = 1$  if  $i$  participates in games  $j$ , and  
34  $a_{ij} = 0$  otherwise.

35 Each player  $i$  is initially assigned an endowment  $e_i \geq 0$ , representing their income or the time  
36 and effort they invest in the game. The vector of endowments is denoted as  $\mathbf{e} = (e_1, e_2, \dots, e_N)$ ,  
37 and without loss of generality, we assume that the endowment vector is normalized such that  
38  $\sum_{i=1}^N e_i = 1$ . In the case of equal endowments among all players, the endowment vector sim-  
39 plifies to  $\mathbf{e} = (\frac{1}{N}, \frac{1}{N}, \dots, \frac{1}{N})$ .

40 Each player may contribute a certain fraction of their endowment to the games in which they  
41 participate. We define the contribution matrix as  $X = \{x_{ij}\} \in R^{N \times M}$ , where  $x_{ij}$  represents  
42 the proportion of contributions from node  $i$  to game  $j$ . The constraints are  $0 \leq x_{ij} \leq 1$  and  
43  $0 \leq \sum_{j=1}^M x_{ij} \leq 1$  for any  $i$ . We do not require  $\sum_{j=1}^M x_{ij} = 1$  because individuals may re-  
44 tain a portion of their endowment without participating in the game. We introduce a shorthand  
45 notation,  $X = \{\mathbf{1}\}$ , to represent the full cooperation where each player contributes their entire  
46 endowment, meaning  $\sum_{j=1}^M x_{ij} = 1$  for any  $i$ . In addition, the full cooperation is not unique.

47 The payoffs of public goods gaming are determined by endowments, contribution strategies,  
48 and individual player productivity. Specifically, given an endowment distribution  $\mathbf{e}$  and a con-

tribution matrix  $X = \{x_{ij}\}$ , players generate a payoff vector  $u(e, X) \in R^N$ , where  $u$  represents the payoff function of the game. The element  $u_i$  in the  $i$ -th row corresponds to the benefit of player  $i$ . The total payoff of all game groups in the hypergraph is the sum of the benefits of all players, expressed as  $U(e, X) = \sum_{i=1}^N u_i(e, X)$ .

## 1.2 Public goods games create social dilemmas

In the classical public goods game, players face a dilemma when deciding their strategies. A brief overview of the public goods game problem is as follows: Each player must choose whether to invest a certain amount of money  $c$  into the public funds (cooperation strategy) or not (betray strategy). The public fund is then multiplied by a factor of  $r$  and distributed equally among all individuals. The payoff for each player can be expressed in the following form:

|            | 1                  | ... | $k$                 | ... | $N - 1$                 |
|------------|--------------------|-----|---------------------|-----|-------------------------|
| cooperator | $\frac{rc}{N} - c$ | ... | $\frac{rck}{N} - c$ | ... | $\frac{rc(N-1)}{N} - c$ |
| betray     | $\frac{rc}{N}$     | ... | $\frac{rck}{N}$     | ... | $\frac{rc(N-1)}{N}$     |

Table 1: The payoffs of cooperators and betrayers in all situations in the public goods game. The first row shows the number of cooperators, while the second and third rows correspond to their cooperator payoffs and betrayer payoffs, respectively.

In the public goods game, as illustrated in Table 1, three properties need to be satisfied for the game to create a dilemma:

1. Positive Externality Property: A player desires their companions to cooperate, resulting in higher profits for themselves. When the number of cooperators is  $k$ , the betrayer's payoff is  $\frac{rck}{N}$ . If one betrayer becomes a cooperator, the betrayer's payoff becomes  $\frac{rc(k+1)}{N}$ . The positive externality property is satisfied by ensuring  $r > 0$ .

2. Incentive of Free-rides Property: Players choose the betrayal strategy to obtain higher benefits. When  $k + 1$  individuals cooperate, the cooperator's payoff is  $\frac{rc(k+1)}{N} - c$ . If one of the cooperators chooses to betray, their payoff becomes  $\frac{rck}{N}$ . This property is satisfied if  $\frac{rck}{N} > \frac{rc(k+1)}{N} - c$ , which implies  $r < N$ .

3. Optimality of Cooperation Property: From a collective perspective, players need to fully cooperate to achieve higher benefits for all players. When the number of cooperators is  $k$ , the collective payoff is  $k(\frac{rck}{N} - c) + (N - k)\frac{rck}{N} = kc(r - 1)$ . Full cooperation results in the highest payoff when  $r > 1$ .

Therefore, the game creates a dilemma whenever  $1 < r < N$ . In such situations, players face a conflict between their incentives to betray and the collective benefits of cooperation.

75 In this paper, we study a public goods game that generates a dilemma, similar to the one dis-  
 76 cussed above. We consider a public goods game with the following four properties:

77 **(C) Continuity:** The payoff function  $u(e, X)$  is continuous with respect to the parameters  $e$   
 78 and  $X$ .

79 **(PE) Positive Externality:** Given two contribution matrices  $X$  and  $X'$ , where  $x_{ik} = x'_{ik}$  and  
 80  $x_{jk} \geq x'_{jk}$  for all  $j \neq i$  and  $k = \{1, 2, \dots, M\}$ , we can conclude that  $u_i(e, X) \geq u_i(e, X')$   
 81 for all endowment distributions  $e$ . The strict inequality  $u_i(e, X) > u_i(e, X')$  holds if and  
 82 only if there exists at least one node  $j$  in the hyperedge  $k$  associated with node  $i$  satisfying  
 83  $a_{ik}a_{jk} > 0$ ,  $e_j > 0$  and  $x_{jk} > x'_{jk}$ .

84 **(IF) Incentive of Free-rides:** Given two contribution matrices  $X$  and  $X'$ , where  $x_{ik} < x'_{ik}$  and  
 85  $x_{jk} = x'_{jk}$  for all  $j \neq i$  and  $k = \{1, 2, \dots, M\}$ , we can conclude that  $u_i(e, X) \geq u_i(e, X')$   
 86 for all endowment distributions  $e$ . The strict inequality  $u_i(e, X) > u_i(e, X')$  holds if and  
 87 only if player  $i$ 's endowment is positive,  $e_i > 0$ .

88 **(OC) Optimality of Cooperation:** Given two contribution matrices  $X$  and  $X'$ , where  $x_{ik} \geq x'_{ik}$   
 89 and  $x_{jk} \geq x'_{jk}$  for all  $j \neq i$  and  $k = \{1, 2, \dots, M\}$ , we can conclude that  $U(e, X) \geq$   
 90  $U(e, X')$  for all endowment distributions  $e$ . The strict inequality  $U(e, X) > U(e, X')$   
 91 holds if and only if there is a player  $i$  with  $e_i > 0$  and  $x_{ik} > x'_{ik}$ .

### 92 1.3 Repeated games

93 This paper examines a scenario where different individuals interact for the same number of  
 94 rounds across various games. Interactions are repeated over time with a continuation probability  
 95  $\delta$ , which represents the likelihood of proceeding to the next round after each iteration. The  
 96 expected number of rounds follows a geometric distribution, with the expected number of rounds  
 97 being  $\frac{1}{1-\delta}$ . All players receive the same endowment in each round, with the initial endowment  
 98 distribution denoted as  $e$ . However, the contribution matrix  $X$  changes based on the outcome  
 99 of each round of the game. Player  $i$  determines the contribution  $x_{ik}(t+1)$  for the next round  
 100 based on their previous contribution  $x_{ik}(t)$  and the payoff obtained.

101 The player's strategy in the repeated game is determined by the percentage of contribution at  
 102 each moment. If we define the contribution matrix at the moment  $t$  as  $X(t) \in R^{N \times M}$ , the payoff  
 103 of the repeated game can be defined as a weighted average:

$$\pi_i = (1 - \delta) \sum_{t=0}^{\infty} \delta^t u_i(e, X(t)). \quad (1)$$

104 When  $\delta \rightarrow 1$ , the player payoff is obtained from the limit of the average payoff in each round

105 [1]:

$$\pi_i = \lim_{T \rightarrow +\infty} \frac{1}{T} \sum_{t=0}^{T-1} u_i(\mathbf{e}, X(t)). \quad (2)$$

## 2 Static equilibrium analysis

In this section, we explore the concept of subgame perfect equilibrium in repeated games. In a one-shot public goods game, the Nash equilibrium results in zero contribution; however, this outcome can be altered in a repeated setting [1, 2]. We focus on subgame perfect equilibrium, where players contribute their entire endowment in each round of the game. Given the game's history, no player has the incentive to deviate from the strategy of contributing their entire endowment, making this strategy profile a subgame perfect equilibrium [3]. Subgame perfect equilibrium is a more refined concept than Nash equilibrium. While every subgame perfect equilibrium is a Nash equilibrium, the reverse is not necessarily true [4].

### 2.1 General condition for full cooperation

The feasible interval of full cooperation represents the range of intervals in which all participants will contribute their entire endowment in each round, given the payoff function  $u$  and the continuation probability  $\delta$ . In other words, given  $u$  and  $\delta$ , it determines what endowment distribution  $e$  would allow participants to maintain full cooperation at all times (subgame perfect equilibrium). Let  $E_u(\delta) = \{e = (e_1, e_2, \dots, e_N)\}$  denote the set of all endowment distributions that allow for full cooperation. We consider the payoff function  $u$  for a generalized linear public goods game:

$$u_i(e, X) = \sum_{k=1}^M \frac{a_{ik}}{|l_k|} \sum_{j=1}^N r_{jk} x_{jk} e_j + (1 - \sum_{k=1}^M x_{ik}) e_i, \quad (3)$$

where  $r_{jk}$  is the productivity factor of node  $j$  on the  $k$ -th hyperedge and  $|l_k|$  is the number of nodes on the  $k$ -th hyperedge. We denote by  $X = \{\mathbf{1}_{-i}\}$  the situation in which all players except  $i$  contribute their full endowments, while player  $i$  contributes nothing; that is,  $\sum_{k=1}^M x_{ik} = 0$  and  $\sum_{k=1}^M x_{jk} = 1, \forall j \neq i$ . We propose two assumptions.

**Assumption 2.1**  $\forall r_{j1} = r_{j2} = \dots = r_{jM} = r_j, \forall j \in N$ . (Asymmetric productivity)

**Assumption 2.2**  $\forall |l_1| = |l_2| = \dots = |l_M| = \sigma$ . (Uniform hypergraph)

**Lemma 2.1** Consider a public goods game with a payoff function  $u$  of the form given in Eq.(3) and a continuation probability  $\delta$ , under a given endowment distribution  $e$ . Assuming that Assumptions 2.1 and 2.2 hold, the following three conditions are equivalent:

1.  $e \in E_u(\delta)$ ,

134 2. The following condition holds for all players  $i$  with  $e_i > 0$ ,

135

$$\delta(u_i(e, \{\mathbf{1}_{-i}\}) - u_i(e, O)) \geq u_i(e, \{\mathbf{1}_{-i}\}) - u_i(e, \{\mathbf{1}\}), \quad (4)$$

136 3. The strategy profile where all players apply the strategy Grim is a subgame perfect equi-  
137 librium for the given endowment distribution  $e$ .

138 *Proof*  $1 \Rightarrow 2$  Satisfying  $e \in E_u(\delta)$  indicates that under a given endowment allocation scheme,  
139 each player opts for the full cooperation, i.e.,  $X = \{\mathbf{1}\}$ . First, we need to prove that a player  $i$   
140 altering their full cooperation does not impact their payoff, thus  $u_i(e, \{\mathbf{1}\}) = u_i(e, \{\mathbf{1}'\})$ . Here,  
141  $\{\mathbf{1}'\}$  implies that while all  $x_{jk}$  remain constant, only  $x'_{ik}$  varies with  $\sum_{k=1}^M x'_{ik} = 1$ . If this  
142 condition is not met, any change in player  $i$ 's strategy will either increase or decrease its pay-  
143 off, failing to achieve subgame perfect equilibrium. Considering two different full cooperation  
144 strategies  $X = \{\mathbf{1}\}$  and  $X' = \{\mathbf{1}'\}$ , player  $i$ 's payoff is calculated as:

$$\begin{aligned} u_i(e, \{\mathbf{1}\}) &= \sum_{k=1}^M \frac{a_{ik}}{|l_k|} \sum_{j=1}^N r_{jk} x_{jk} e_j + (1 - \sum_{k=1}^M x_{ik}) e_i \\ &= \sum_{k=1}^M \frac{a_{ik}}{|l_k|} \sum_{j \neq i}^N r_{jk} x_{jk} e_j + \sum_{k=1}^M \frac{a_{ik}}{|l_k|} r_{ik} x_{ik} e_i + (1 - \sum_{k=1}^M x_{ik}) e_i \\ &= \sum_{k=1}^M \frac{a_{ik}}{|l_k|} \sum_{j \neq i}^N r_{jk} x_{jk} e_j + e_i \sum_{k=1}^M \frac{r_{ik}}{|l_k|} x_{ik}. \end{aligned} \quad (5)$$

145 When assumptions 2.1 and 2.2 are satisfied, the payoff  $u_i(e, \{\mathbf{1}\})$  simplifies to:

$$\begin{aligned} u_i(e, \{\mathbf{1}\}) &= \sum_{k=1}^M \frac{a_{ik}}{\sigma} \sum_{j \neq i}^N r_j x_{jk} e_j + e_i \sum_{k=1}^M \frac{r_i}{\sigma} x_{ik} \\ &= \sum_{k=1}^M \frac{a_{ik}}{\sigma} \sum_{j \neq i}^N r_j x_{jk} e_j + \frac{e_i r_i}{\sigma} \sum_{k=1}^M x_{ik}. \end{aligned} \quad (6)$$

146 This leads us to conclude that  $u_i(e, \{\mathbf{1}'\}) = \sum_{k=1}^M \frac{a_{ik}}{\sigma} \sum_{j \neq i}^N r_j x_{jk} e_j + \frac{e_i r_i}{\sigma} \sum_{k=1}^M x'_{ik}$ . Given that  
147  $\sum_{k=1}^M x_{ik} = \sum_{k=1}^M x'_{ik} = 1$  and  $x_{jk}$  remains constant, it follows that  $u_i(e, \{\mathbf{1}\}) = u_i(e, \{\mathbf{1}'\})$ .  
148 Next, we introduce a “mutant” who deviates from the full cooperation, its payoff in the subse-  
149 quent round is  $u_i(e, \{\mathbf{1}_{-i}\})$ . By the (PE) property, the “mutant's” minimum payoff would be  
150  $u_i(e, O)$ , leading to the conclusion:

$$\pi_M \geq (1 - \delta)u_i(e, \{\mathbf{1}_{-i}\}) + \delta u_i(e, O). \quad (7)$$

151 As the full cooperation is a subgame perfect equilibrium, it follows that:

$$u_i(e, \{1\}) \geq (1 - \delta)u_i(e, \{1_{-i}\}) + \delta u_i(e, O), \quad (8)$$

152 or equivalently,

$$\delta(u_i(e, \{1_{-i}\}) - u_i(e, O)) \geq u_i(e, \{1_{-i}\}) - u_i(e, \{1\}). \quad (9)$$

153  $2 \Rightarrow 3$  It is essential to note that the Grim strategy, in the context of repeated multi-player games  
 154 on hypergraphs, implies that initially, all players adopt the full cooperation. Should any player  
 155 choose betrayal, every player within the related hyperedge will also switch to betray. This effect  
 156 cascades to the remaining players and so forth.

157 Our objective is to demonstrate that the Grim strategy constitutes a subgame perfect equilibrium.  
 158 Employing the one-time deviation principle [4], we observe that an individual's betrayal initially  
 159 impacts only their immediate neighbors. As the game progresses, this effect subtly spreads, ulti-  
 160 mately resulting in either universal betrayal or game termination, under the presumption that all  
 161 adhere to the Grim strategy. Importantly, the initial advantage gained by player  $i$  from betrayal  
 162 is confined to its adjacent connections, influencing their responses till the game's conclusion.  
 163 Hence, the betrayal payoff for node  $i$  aligns with  $u_i(e, O)$ . The immediate payoff following  
 164 a "mutant" intervention is  $u_i(e, \{1_{-i}\})$ , with all subsequent rounds approximated as  $u_i(e, O)$ .  
 165 The continuous payoffs, therefore, are:

$$\pi_M = (1 - \delta)u_i(e, \{1_{-i}\}) + \delta u_i(e, O). \quad (10)$$

166 Adherence to the inequality condition in 2 ensures that players gain no additional benefit from  
 167 a one-time deviation under the Grim strategy, solidifying its status as a subgame perfect equi-  
 168 librium.

169  $3 \Rightarrow 1$  With all players adhering to the Grim strategy, they each consistently choose the full  
 170 cooperation in every round. This collective commitment to the Grim strategy inherently es-  
 171 tablishes a subgame perfect equilibrium. Consequently, full cooperation is feasible among all  
 172 participants.  $\square$

173 Under the condition that Lemma 2.1 is satisfied, the following Lemmas 2.2 and 2.3 can be  
 174 obtained according to Ref. [5].

175 **Lemma 2.2** *We consider that a public good game with payoff function  $u$  has the form of Eq.*  
 176 *(3) and Assumption 2.1 and 2.2 are satisfied.*

177 1. Suppose  $\delta$  and  $\delta'$  are two continuation probabilities with  $\delta < \delta'$ . Then  $E_u(\delta) \subset E_u(\delta')$ .

178 2. There is a  $\delta' < 1$  such that  $E_u(\delta) \neq 0$  for all  $\delta \geq \delta'$ .

179 **Lemma 2.3** Consider a public good game with continuation probability  $\delta < 1$  and endowment  
 180 distribution  $e$ . For any player  $i$ , there is an  $\epsilon_i > 0$  such that if player  $i$ 's endowment exceeds  
 181  $e_i = 1 - \epsilon_i$  then full cooperation is infeasible.

182 Lemma 2.3 shows that hypergraphs cannot sustain full cooperation if too much of the initial  
 183 endowment is concentrated on a single individual. A similar argument suggests that equal en-  
 184 dowment distribution is most conducive to cooperation. In Ref. [5], it was shown that the payoff  
 185 function  $u$  satisfies a linear symmetric payoff function. However, this conclusion does not hold  
 186 when  $u$  is nonlinear or asymmetric. In this paper, we find that even a linear symmetric payoff  
 187 function does not guarantee that equal endowments are the most favorable for cooperation in  
 188 the hypergraph.

## 189 2.2 Linear symmetric payoff

190 In the following, we consider the public goods game payoff function  $u$  that satisfies the condi-  
 191 tions of Assumptions 2.1 and 2.2 as a linear symmetric payoff function.

$$u_i(e, X) = \sum_{k=1}^M \frac{a_{ik}}{\sigma} \sum_{j=1}^N r x_{jk} e_j + (1 - \sum_{k=1}^M x_{ik}) e_i, \quad (11)$$

192 where  $r$  is the productivity coefficient common to all nodes. We first determine the range of  
 193 parameters based on the three properties **(PE)**, **(IF)**, **(OC)**.

194 1.**(PE)** property satisfies the condition:

$$\begin{aligned} u_i(e, X) &= \sum_{k=1}^M \frac{a_{ik}}{\sigma} \sum_{j=1}^N r x_{jk} e_j + (1 - \sum_{k=1}^M x_{ik}) e_i \\ &= \frac{r}{\sigma} \sum_{k=1}^M a_{ik} \sum_{j \neq i}^N x_{jk} e_j + \frac{r}{\sigma} \sum_{k=1}^M x_{ik} e_i + (1 - \sum_{k=1}^M x_{ik}) e_i. \end{aligned} \quad (12)$$

195 The expression shows that we need to make  $r > 0$  to satisfy the condition.

196 2.(IF) property satisfies the condition:

$$\begin{aligned}
u_i(\mathbf{e}, X) &= \sum_{k=1}^M \frac{a_{ik}}{\sigma} \sum_{j=1}^N r x_{jk} e_j + (1 - \sum_{k=1}^M x_{ik}) e_i \\
&= \frac{r}{\sigma} \sum_{k=1}^M a_{ik} \sum_{j \neq i}^N x_{jk} e_j + \frac{r}{\sigma} \sum_{k=1}^M x_{ik} e_i + (1 - \sum_{k=1}^M x_{ik}) e_i \\
&= \frac{r}{\sigma} \sum_{k=1}^M a_{ik} \sum_{j \neq i}^N x_{jk} e_j + \sum_{k=1}^M \left( \frac{r}{\sigma} - 1 \right) x_{ik} e_i + e_i.
\end{aligned} \tag{13}$$

197 The expression shows that we need to make  $r < \sigma$  to satisfy the condition.

198 3.(OC) property satisfies the condition:

$$\begin{aligned}
U(\mathbf{e}, X) &= \sum_{i=1}^N u_i(\mathbf{e}, X) = \sum_{i=1}^N \left[ \sum_{k=1}^M \frac{a_{ik}}{\sigma} \sum_{j=1}^N r x_{jk} e_j + (1 - \sum_{k=1}^M x_{ik}) e_i \right] \\
&= \sum_{i=1}^N \left[ \frac{r}{\sigma} \sum_{k=1}^M a_{ik} \sum_{j \neq i}^N x_{jk} e_j + \frac{r}{\sigma} \sum_{k=1}^M x_{ik} e_i + (1 - \sum_{k=1}^M x_{ik}) e_i \right] \\
&= \sum_{i=1}^N \left[ \frac{r}{\sigma} \sum_{k=1}^M a_{ik} \sum_{j \neq i}^N x_{jk} e_j + \sum_{k=1}^M \left( \frac{r}{\sigma} - 1 \right) x_{ik} e_i + e_i \right] \\
&= \frac{r}{\sigma} \sum_{k=1}^M a_{1k} \sum_{j \neq 1}^N x_{jk} e_j + \frac{r}{\sigma} \sum_{k=1}^M x_{1k} e_1 - \sum_{k=1}^M x_{1k} e_1 + e_1 \\
&\quad + \frac{r}{\sigma} \sum_{k=1}^M a_{2k} \sum_{j \neq 1, j \neq 2}^N x_{jk} e_j + \frac{r}{\sigma} \sum_{k=1}^M a_{2k} x_{1k} e_1 + \frac{r}{\sigma} \sum_{k=1}^M x_{2k} e_2 - \sum_{k=1}^M x_{2k} e_2 + e_2 \\
&\quad + \dots \\
&\quad + \frac{r}{\sigma} \sum_{k=1}^M a_{Nk} \sum_{j \neq 1, j \neq N}^N x_{jk} e_j + \frac{r}{\sigma} \sum_{k=1}^M a_{Nk} x_{1k} e_1 + \frac{r}{\sigma} \sum_{k=1}^M x_{Nk} e_N - \sum_{k=1}^M x_{Nk} e_N + e_N \\
&= e_1 \left[ \frac{r}{\sigma} \sum_{k=1}^M (a_{2k} x_{1k} + a_{3k} x_{1k} + \dots + a_{Nk} x_{1k} + x_{1k} - \frac{\sigma}{r} x_{1k}) + 1 \right] \\
&\quad + e_2 \left[ \frac{r}{\sigma} \sum_{k=1}^M (a_{1k} x_{2k} + a_{3k} x_{2k} + \dots + a_{Nk} x_{2k} + x_{2k} - \frac{\sigma}{r} x_{2k}) + 1 \right] \\
&\quad + \dots \\
&\quad + e_N \left[ \frac{r}{\sigma} \sum_{k=1}^M (a_{1k} x_{Nk} + a_{2k} x_{Nk} + \dots + a_{(N-1)k} x_{Nk} + x_{Nk} - \frac{\sigma}{r} x_{Nk}) + 1 \right].
\end{aligned} \tag{14}$$

199 The expression shows that we need to make  $\sum_{j=1}^N a_{jk} > \frac{\sigma}{r}$  with  $\forall k$  to satisfy the condition.  
 200 Where  $\sum_{j=1}^N a_{jk} = \sigma$ , the property **(OC)** is satisfied as long as there is  $r > 1$ .  
 201 In summary, the three properties are satisfied, and the parameter  $r$  needs to satisfy  $1 < r < \sigma$ .  
 202 Next, we start to discuss the feasible interval of full cooperation in the public goods game under  
 203 the linear symmetric payoff function.

204 **Theorem 2.1** *The payoff function of a public goods game is given by Eq. (11). For a contri-*  
 205 *bution matrix  $X$  and a productivity coefficient  $1 < r < \sigma$ ,  $e \in E_u(\delta)$  holds if the continuation*  
 206 *probability  $\delta \geq \frac{\max\{e_i\}(\sigma-r)}{r \min\{e_i\} \sum_{k=1}^M \sum_{j \neq i}^N a_{ik} x_{jk}}$  with  $\forall i$ , and the equal endowments  $e = (\frac{1}{N}, \frac{1}{N}, \dots, \frac{1}{N})$*   
 207 *also belong to  $e \in E_u(\delta)$ .*

208 *Proof* According to Lemma 2.1, we first calculate the three payoff functions.

$$\begin{aligned} u_i(e, \{\mathbf{1}_{-i}\}) &= \frac{r}{\sigma} \sum_{k=1}^M a_{ik} \sum_{j \neq i}^N x_{jk} e_j + e_i, \\ u_i(e, O) &= e_i, \\ u_i(e, \{\mathbf{1}\}) &= \frac{r}{\sigma} \sum_{k=1}^M a_{ik} \sum_{j \neq i}^N x_{jk} e_j + \frac{r}{\sigma} e_i. \end{aligned} \tag{15}$$

209 Applying Lemma 2.1, we obtain sufficient conditions under which the endowment vector  $e$   
 210 belongs to the full cooperation feasible set  $E_u(\delta)$ , as follows:

$$\begin{aligned} &\delta(u_i(e, \{\mathbf{1}_{-i}\}) - u_i(e, O)) \geq u_i(e, \{\mathbf{1}_{-i}\}) - u_i(e, \{\mathbf{1}\}) \\ \Rightarrow &\delta\left(\frac{r}{\sigma} \sum_{k=1}^M a_{ik} \sum_{j \neq i}^N x_{jk} e_j + e_i - e_i\right) \geq \frac{r}{\sigma} \sum_{k=1}^M a_{ik} \sum_{j \neq i}^N x_{jk} e_j + e_i - \frac{r}{\sigma} \sum_{k=1}^M a_{ik} \sum_{j \neq i}^N x_{jk} e_j - \frac{r}{\sigma} e_i \\ \Rightarrow &\delta \frac{r}{\sigma} \sum_{k=1}^M a_{ik} \sum_{j \neq i}^N x_{jk} e_j \geq \left(1 - \frac{r}{\sigma}\right) e_i \\ \Rightarrow &\delta \geq \frac{(\sigma - r) e_i}{r \sum_{k=1}^M a_{ik} \sum_{j \neq i}^N x_{jk} e_j}, \end{aligned} \tag{16}$$

211 where it is required that inequality (16) holds for all players  $i$  with  $e_i > 0$ . Enlarging the right-  
 212 hand side of inequality (16) can satisfy all  $i$  holds:

$$\delta \geq \frac{\max\{e_i\}(\sigma - r)}{r \min\{e_i\} \sum_{k=1}^M \sum_{j \neq i}^N a_{ik} x_{jk}} \geq \frac{(\sigma - r) e_i}{r \sum_{k=1}^M a_{ik} \sum_{j \neq i}^N x_{jk} e_j} = \frac{(\sigma - r)}{r \sum_{k=1}^M a_{ik} \sum_{j \neq i}^N x_{jk} \frac{e_j}{e_i}}. \tag{17}$$

213 Thus  $e$  is feasible for full cooperation as long as inequality (17) is satisfied. Equal endowments

214  $\mathbf{e} = (\frac{1}{N}, \frac{1}{N}, \dots, \frac{1}{N})$  must also be feasible for full cooperation.

$$\delta \geq \frac{\max\{e_i\}(\sigma - r)}{r \min\{e_i\} \sum_{k=1}^M \sum_{j \neq i}^N a_{ik} x_{jk}} \geq \frac{(\sigma - r) \frac{1}{N}}{r \frac{1}{N} \sum_{k=1}^M a_{ik} \sum_{j \neq i}^N x_{jk}}, \quad (18)$$

215 where the inequality holds for  $\max\{e_i\} \geq \frac{1}{N}$  and  $\min\{e_i\} \leq \frac{1}{N}$ .  $\square$

216 Inequality (18) in Theorem 2.1 indicates that node  $i$  is most likely to deviate from full coopera-  
 217 tion when the other nodes in all the hyperedges that node  $i$  participates in contribute the lowest  
 218 sum to these hyperedges. In other words, under the equal endowment condition, if the hyper-  
 219 degree of node  $i$  is 1 and the number of participating contributing nodes is  $\sigma - 1$ , it will have a  
 220 higher probability of deviating from full cooperation easily. In a hypergraph, nodes with lower  
 221 hyperdegree (players involved in fewer public goods games) will have a slightly higher proba-  
 222 bility of deviating from full cooperation. Turning to inequality (17), for an arbitrary endowment  
 223 distribution, node  $i$  is more likely to deviate from full cooperation when its endowment is low  
 224 and hyperdegree is small.

225 Theorem 2.1 is only a sufficient condition, it does not mean that other  $\delta$  that do not satisfy the  
 226 condition are not feasible for full cooperation. Moreover, Theorem 2.1 shows that equal endow-  
 227 ments are not feasible for full cooperation as long as the condition is satisfied. In the following,  
 228 we present an example in which equal endowments are not feasible for full cooperation, yet a  
 229 non-empty feasible interval for full cooperation still exists.

230 Consider a set of linear symmetric payoff functions:

$$\begin{aligned} u_1(\mathbf{e}, X) &= \frac{r}{3}(x_{11}e_1 + x_{21}e_2 + x_{31}e_3) + (1 - x_{11})e_1, \\ u_2(\mathbf{e}, X) &= \frac{r}{3}(x_{11}e_1 + x_{21}e_2 + x_{31}e_3 + x_{22}e_2 + x_{32}e_3 + x_{42}e_4) + (1 - x_{21} - x_{22})e_2, \\ u_3(\mathbf{e}, X) &= \frac{r}{3}(x_{11}e_1 + x_{21}e_2 + x_{31}e_3 + x_{22}e_2 + x_{32}e_3 + x_{42}e_4) + (1 - x_{31} - x_{32})e_3, \\ u_4(\mathbf{e}, X) &= \frac{r}{3}(x_{22}e_2 + x_{32}e_3 + x_{42}e_4) + (1 - x_{42})e_4. \end{aligned} \quad (19)$$

231 Let  $x_{11} = 1, x_{21} = \frac{1}{3}, x_{22} = \frac{2}{3}, x_{31} = \frac{2}{3}, x_{32} = \frac{1}{3}, x_{42} = 1$ . Then for equal endowments  
 232  $\mathbf{e} = (\frac{1}{4}, \frac{1}{4}, \frac{1}{4}, \frac{1}{4})$ ,  $\delta$  need to satisfy the following condition:

$$\begin{aligned} \delta_1 &\geq \frac{3-r}{r}, \\ \delta_2 &\geq \frac{3-r}{3r}, \\ \delta_3 &\geq \frac{3-r}{3r}, \\ \delta_4 &\geq \frac{3-r}{r}. \end{aligned} \quad (20)$$

Thus it is only necessary to make  $\delta \geq \frac{3-r}{r}$  so that equal distribution is feasible for full cooperation. In the following, we apply a perturbation to the equal endowments and the perturbed endowments  $e' = (\frac{1}{4} - \epsilon, \frac{1}{4} + 2\epsilon, \frac{1}{4}, \frac{1}{4} - \epsilon)$ . Below we calculate the  $\delta$  conditions it has to satisfy:

$$\begin{aligned}\delta_1 &\geq \frac{3-r}{r \frac{1+\frac{8\epsilon}{3}}{1-4\epsilon}}, \\ \delta_2 &\geq \frac{3-r}{r \frac{3-8\epsilon}{1+8\epsilon}}, \\ \delta_3 &\geq \frac{3-r}{3r}, \\ \delta_4 &\geq \frac{3-r}{r \frac{1+4\epsilon}{1-4\epsilon}}\end{aligned}\tag{21}$$

The perturbed endowments only need to satisfy  $\delta \geq \frac{3-r}{r \frac{1+\frac{8\epsilon}{3}}{1-4\epsilon}}$  to make it feasible for full cooperation. Comparing the two values, we find that whenever we take  $\delta \in [\frac{3-r}{r \frac{1+\frac{8\epsilon}{3}}{1-4\epsilon}}, \frac{3-r}{r}]$ , we make the equal endowments not feasible for full cooperation and will still have feasible intervals of full cooperation. We obtain the following corollary:

**Corollary 1** *There exists a linear symmetric public goods game function  $u$  such that  $E_u(\delta) \neq \emptyset$ , but  $e = (\frac{1}{N}, \frac{1}{N}, \dots, \frac{1}{N}) \neq E_u(\delta)$ .*

In addition, we find that the total payoff is the same for any feasible interval of full cooperation under the linear symmetric payoff function.

**Corollary 2** *The payoff function  $u$  of the public goods game under any linear symmetric payoff function satisfies  $\forall e_1, e_2 \in E_u(\delta)$  and  $X(0) = \{\mathbf{1}\}$ , we can get  $\sum_{i=1}^N \pi_i(e_1, \{\mathbf{1}\}) = \sum_{i=1}^N \pi_i(e_2, \{\mathbf{1}\}) = r$ .*

*Proof* Since the initial moment  $X(0) = \{\mathbf{1}\}$  and  $e \in E_u(\delta)$ , the initial contribution matrix  $X(t) = X(0)$  is maintained for all subsequent moments. It is straightforward to calculate the

249 total payoff:

$$\begin{aligned}
\sum_{i=1}^N \pi_i(e, \{\mathbf{1}\}) &= \sum_{i=1}^N (1 - \delta) \sum_{t=0}^{\infty} \delta^t u_i(e, \{\mathbf{1}\}) = \sum_{i=1}^N u_i(e, \{\mathbf{1}\}) = U(e, \{\mathbf{1}\}). \\
U(e, \{\mathbf{1}\}) &= e_1 \left[ \frac{r}{\sigma} \sum_{k=1}^M (a_{2k}x_{1k} + a_{3k}x_{1k} + \cdots + a_{Nk}x_{1k} + x_{1k} - \frac{\sigma}{r}x_{1k}) + 1 \right] \\
&+ e_2 \left[ \frac{r}{\sigma} \sum_{k=1}^M (a_{1k}x_{2k} + a_{3k}x_{2k} + \cdots + a_{Nk}x_{2k} + x_{2k} - \frac{\sigma}{r}x_{2k}) + 1 \right] \\
&+ \dots \\
&+ e_N \left[ \frac{r}{\sigma} \sum_{k=1}^M (a_{1k}x_{Nk} + a_{2k}x_{Nk} + \cdots + a_{(N-1)k}x_{Nk} + x_{Nk} - \frac{\sigma}{r}x_{Nk}) + 1 \right] \tag{22} \\
&= e_1 \left[ \frac{r}{\sigma} \sum_{k=1}^M \left( \sum_{j=1}^N a_{jk} - \frac{\sigma}{r} \right) x_{1k} + 1 \right] + \cdots + e_N \left[ \frac{r}{\sigma} \sum_{k=1}^M \left( \sum_{j=1}^N a_{jk} - \frac{\sigma}{r} \right) x_{Nk} + 1 \right] \\
&= e_1 \left[ \frac{r}{\sigma} \left( \sigma - \frac{\sigma}{r} \right) \sum_{k=1}^M x_{1k} + 1 \right] + \cdots + e_N \left[ \frac{r}{\sigma} \left( \sigma - \frac{\sigma}{r} \right) \sum_{k=1}^M x_{Nk} + 1 \right] \\
&= r \left( \sum_{i=1}^N e_i \right) = r
\end{aligned}$$

250

□

251 In Ref. [5] it was shown that the equal endowments are the most favorable for cooperation in  
252 a public goods game with a linear symmetric payoff function. However, Corollary 1 reveals  
253 that, in multi-player public goods games on hypergraphs, even equal endowments under linear  
254 symmetric payoff functions are not the most favorable for promoting cooperation. In addition,  
255 Corollary 2 finds that as long as the distribution of endowments falls within the feasible interval  
256 of full cooperation and the initial state is fully cooperative, the total payoff of the game is the  
257 same as the highest.

## 258 2.3 Linear asymmetric payoff

259 We extend the symmetric payoff function so that the productivity coefficients need only satisfy  
260 Assumption 2.1. Consider the public goods game payoff function  $u$ :

$$u_i(e, X) = \sum_{k=1}^M \frac{a_{ik}}{\sigma} \sum_{j=1}^N r_j x_{jk} e_j + \left( 1 - \sum_{k=1}^M x_{ik} \right) e_i. \tag{23}$$

261 We still first discuss the range of values of the parameter  $r_j$ .

262 1.(PE) property satisfies the condition:

$$\begin{aligned}
u_i(e, X) &= \sum_{k=1}^M \frac{a_{ik}}{\sigma} \sum_{j=1}^N r_j x_{jk} e_j + (1 - \sum_{k=1}^M x_{ik}) e_i \\
&= \frac{1}{\sigma} \sum_{k=1}^M a_{ik} \sum_{j \neq i}^N r_j x_{jk} e_j + \frac{1}{\sigma} \sum_{k=1}^M r_i x_{ik} e_i + e_i - \sum_{k=1}^M x_{ik} e_i.
\end{aligned} \tag{24}$$

263 The expression shows that we need to make  $r_j > 0$  with  $\forall j$  to satisfy the condition.

264 2.(IF) property satisfies the condition:

$$\begin{aligned}
u_i(e, X) &= \sum_{k=1}^M \frac{a_{ik}}{\sigma} \sum_{j=1}^N r_j x_{jk} e_j + (1 - \sum_{k=1}^M x_{ik}) e_i \\
&= \frac{1}{\sigma} \sum_{k=1}^M a_{ik} \sum_{j \neq i}^N r_j x_{jk} e_j + \frac{1}{\sigma} \sum_{k=1}^M r_i x_{ik} e_i + e_i - \sum_{k=1}^M x_{ik} e_i \\
&= \frac{1}{\sigma} \sum_{k=1}^M a_{ik} \sum_{j \neq i}^N r_j x_{jk} e_j + \sum_{k=1}^M \left( \frac{r_i}{\sigma} - 1 \right) x_{ik} e_i + e_i.
\end{aligned} \tag{25}$$

265 The expression shows that we need to make  $r_j < \sigma$  with  $\forall j$  to satisfy the condition.

266 3.(OC) property satisfies the condition:

$$\begin{aligned}
U(e, X) &= \sum_{i=1}^N u_i(e, X) = \sum_{i=1}^N \left[ \sum_{k=1}^M \frac{a_{ik}}{\sigma} \sum_{j=1}^N r_j x_{jk} e_j + (1 - \sum_{k=1}^M x_{ik}) e_i \right] \\
&= e_1 \left[ \frac{r_1}{\sigma} \sum_{k=1}^M (a_{2k} x_{1k} + a_{3k} x_{1k} + \cdots + a_{Nk} x_{1k} + x_{1k} - \frac{\sigma}{r_1} x_{1k}) + 1 \right] \\
&\quad + e_2 \left[ \frac{r_2}{\sigma} \sum_{k=1}^M (a_{1k} x_{2k} + a_{3k} x_{2k} + \cdots + a_{Nk} x_{2k} + x_{2k} - \frac{\sigma}{r_2} x_{2k}) + 1 \right] \\
&\quad + \dots \\
&\quad + e_N \left[ \frac{r_N}{\sigma} \sum_{k=1}^M (a_{1k} x_{Nk} + a_{2k} x_{Nk} + \cdots + a_{(N-1)k} x_{Nk} + x_{Nk} - \frac{\sigma}{r_N} x_{Nk}) + 1 \right].
\end{aligned} \tag{26}$$

267 The expression shows that we need to make  $\sum_{j=1}^N a_{jk} > \frac{\sigma}{r_i}$  with  $\forall k, i$  to satisfy the condition.

268 Where  $\sum_{j=1}^N a_{jk} = \sigma$ , the property (OC) is satisfied as long as there is  $r_i > 1$  with  $\forall i$ .

269 In summary, the three properties hold provided that the parameter  $r_i$  satisfies  $1 < r_i < \sigma$  with  $\forall i$ .

270 In the following, we discuss the feasible interval of full cooperation under the linear asymmetric  
271 payoff function.

272 **Theorem 2.2** *The payoff function of a public goods game is given by Eq. (23). For a con-*  
 273 *tribution matrix  $X$  and productivity coefficient  $1 < r_i < \sigma$  with  $\forall i, e \in E_u(\delta)$  holds if the*  
 274 *continuation probability  $\delta \geq \frac{\max\{e_i(\sigma-r_i)\}}{\min\{e_i r_i\} \sum_{k=1}^M \sum_{j \neq i}^N a_{ik} x_{jk}}$  with  $\forall i$ .*

275 *Proof* Similar to the proof of Theorem 2.1. According to Lemma 2.1, we calculate the 3 payoff  
 276 functions.

$$\begin{aligned} u_i(e, \{\mathbf{1}_{-i}\}) &= \frac{1}{\sigma} \sum_{k=1}^M a_{ik} \sum_{j \neq i}^N r_j x_{jk} e_j + e_i, \\ u_i(e, O) &= e_i, \\ u_i(e, \{\mathbf{1}\}) &= \frac{1}{\sigma} \sum_{k=1}^M a_{ik} \sum_{j \neq i}^N r_j x_{jk} e_j + \frac{r_i}{\sigma} e_i. \end{aligned} \quad (27)$$

277 Applying Lemma 2.1, we derive sufficient conditions under which the endowment vector  $e$  lies  
 278 within the full cooperation feasible set  $E_u(\delta)$ , as follows:

$$\begin{aligned} \delta(u_i(e, \{\mathbf{1}_{-i}\}) - u_i(e, O)) &\geq u_i(e, \{\mathbf{1}_{-i}\}) - u_i(e, \{\mathbf{1}\}) \\ \Rightarrow \delta\left(\frac{1}{\sigma} \sum_{k=1}^M a_{ik} \sum_{j \neq i}^N r_j x_{jk} e_j + e_i - e_i\right) &\geq \frac{1}{\sigma} \sum_{k=1}^M a_{ik} \sum_{j \neq i}^N r_j x_{jk} e_j + e_i - \frac{1}{\sigma} \sum_{k=1}^M a_{ik} \sum_{j \neq i}^N r_j x_{jk} e_j - \frac{r_i}{\sigma} e_i \\ \Rightarrow \delta \frac{1}{\sigma} \sum_{k=1}^M a_{ik} \sum_{j \neq i}^N r_j x_{jk} e_j &\geq \left(1 - \frac{r_i}{\sigma}\right) e_i \\ \Rightarrow \delta &\geq \frac{(\sigma - r_i) e_i}{\sum_{k=1}^M a_{ik} \sum_{j \neq i}^N r_j x_{jk} e_j}, \end{aligned} \quad (28)$$

279 where it is required that inequality (28) holds for all players  $i$  with  $e_i > 0$ . Enlarging the right-  
 280 hand side of inequality (28) can satisfy all  $i$  holds:

$$\delta \geq \frac{\max\{(\sigma - r_i) e_i\}}{\min\{e_i r_i\} \sum_{k=1}^M \sum_{j \neq i}^N a_{ik} x_{jk}} \geq \frac{(\sigma - r_i) e_i}{\sum_{k=1}^M a_{ik} \sum_{j \neq i}^N r_j x_{jk} e_j}. \quad (29)$$

281 Thus  $e$  is fully cooperative as long as inequality (29) is satisfied.  $\square$

282 **Remark 1** *The sufficient conditions in Theorem 2.2 do not guarantee that equal endowments*  
 283 *are also feasible for full cooperation.*

284 Theorem 2.2 gives a sufficient condition for the continuation probability  $\delta$  of full cooperation  
 285 under the asymmetric payoff function. The key factor for node  $i$  to deviate from full cooperation  
 286 that can be obtained from inequality 29 is the combined  $\sum_{j \neq i} r_j x_{jk} e_j$  value of the associated

hyperedge of node  $i$ . When node  $i$  is less associated and has a lower production coefficient  $r_i$ , it will be more likely to deviate from cooperation.

Similar to Corollary 1 and Corollary 2, we can obtain similar conclusions under the asymmetric payoff function.

**Corollary 3** *There exists a linear asymmetric public goods game payoff function  $u$  such that  $E_u(\delta) \neq \emptyset$ , but  $\mathbf{e} = (\frac{1}{N}, \frac{1}{N}, \dots, \frac{1}{N}) \neq E_u(\delta)$ .*

We still consider the example in Corollary 1 by simply varying the productivity coefficient  $r$ . Consider a set of asymmetric payoff functions:

$$\begin{aligned} u_1(\mathbf{e}, X) &= \frac{1}{3}(r_1 x_{11} e_1 + r_2 x_{21} e_2 + r_3 x_{31} e_3) + (1 - x_{11}) e_1, \\ u_2(\mathbf{e}, X) &= \frac{1}{3}(r_1 x_{11} e_1 + r_2 x_{21} e_2 + r_3 x_{31} e_3 + r_2 x_{22} e_2 + r_3 x_{32} e_3 + r_4 x_{42} e_4) + (1 - x_{21} - x_{22}) e_2, \\ u_3(\mathbf{e}, X) &= \frac{1}{3}(r_1 x_{11} e_1 + r_2 x_{21} e_2 + r_3 x_{31} e_3 + r_2 x_{22} e_2 + r_3 x_{32} e_3 + r_4 x_{42} e_4) + (1 - x_{31} - x_{32}) e_3, \\ u_4(\mathbf{e}, X) &= \frac{1}{3}(r_2 x_{22} e_2 + r_3 x_{32} e_3 + r_4 x_{42} e_4) + (1 - x_{42}) e_4. \end{aligned} \tag{30}$$

Let  $x_{11} = 1, x_{21} = \frac{1}{3}, x_{22} = \frac{2}{3}, x_{31} = \frac{2}{3}, x_{32} = \frac{1}{3}, x_{42} = 1, r_1 = 2 + \epsilon, r_2 = 2, r_3 = 2, r_4 = 2 + \epsilon$ . Then for equal endowments  $\mathbf{e} = (\frac{1}{4}, \frac{1}{4}, \frac{1}{4}, \frac{1}{4})$ ,  $\delta$  need to satisfy the following condition:

$$\begin{aligned} \delta_1 &\geq \frac{3 - 2 - \epsilon}{2\frac{1}{3} + 2\frac{2}{3}} = \frac{1 - \epsilon}{2}, \\ \delta_2 &\geq \frac{3 - 2}{2 + \epsilon + 2 + 2 + \epsilon} = \frac{1}{6 + 2\epsilon}, \\ \delta_3 &\geq \frac{3 - 2}{2 + \epsilon + 2 + 2 + \epsilon} = \frac{1}{6 + 2\epsilon}, \\ \delta_4 &\geq \frac{3 - 2 - \epsilon}{2\frac{2}{3} + 2\frac{1}{3}} = \frac{1 - \epsilon}{2}. \end{aligned} \tag{31}$$

Thus it is only necessary to make  $\delta \geq \frac{1 - \epsilon}{2}$  so that equal distribution is feasible for full cooperation. In the following, we apply a perturbation to the equal endowments and the perturbed

299 endowments  $e' = (\frac{1}{4} - \epsilon, \frac{1}{4} + 2\epsilon, \frac{1}{4}, \frac{1}{4} - \epsilon)$ . Below we calculate the  $\delta$  conditions it has to satisfy:

$$\begin{aligned}
\delta_1 &\geq \frac{(3-2-\epsilon)(\frac{1}{4}-\epsilon)}{2(\frac{1}{4}+2\epsilon)\frac{1}{3}+2\frac{1}{4}\frac{2}{3}} = \frac{(1-\epsilon)(1-4\epsilon)}{2+\frac{16}{3}\epsilon}, \\
\delta_2 &\geq \frac{(3-2)(\frac{1}{4}+2\epsilon)}{(2+\epsilon)(\frac{1}{4}-\epsilon)+2\frac{1}{4}+(2+\epsilon)(\frac{1}{4}-\epsilon)} = \frac{1+8\epsilon}{6+2\epsilon-(2+\epsilon)(4\epsilon)}, \\
\delta_3 &\geq \frac{(3-2)\frac{1}{4}}{(2+\epsilon)(\frac{1}{4}-\epsilon)+2(\frac{1}{4}+2\epsilon)+(2+\epsilon)(\frac{1}{4}-\epsilon)} = \frac{1}{6+2\epsilon+16\epsilon-(2+\epsilon)(4\epsilon)}, \\
\delta_4 &\geq \frac{(3-2-\epsilon)(\frac{1}{4}-\epsilon)}{2(\frac{1}{4}+2\epsilon)\frac{2}{3}+2\frac{1}{4}\frac{1}{3}} = \frac{(1-\epsilon)(1-4\epsilon)}{2+\frac{32}{3}\epsilon}
\end{aligned} \tag{32}$$

300 The perturbed endowments only need to satisfy  $\delta \geq \frac{(1-\epsilon)(1-4\epsilon)}{2+\frac{16}{3}\epsilon}$  to make it feasible for full  
301 cooperation. Comparing the two values, we find that whenever we take  $\delta \in [\frac{(1-\epsilon)(1-4\epsilon)}{2+\frac{16}{3}\epsilon}, \frac{1-\epsilon}{2}]$ ,  
302 we make the equal endowments not feasible for full cooperation and will still have feasible  
303 intervals of full cooperation.

304 **Corollary 4** *The payoff function  $u$  of the public goods game under any linear asymmetric payoff*  
305 *function satisfies  $\forall e \in E_u(\delta)$  and  $X(0) = \{\mathbf{1}\}$ , we can get  $\sum_{i=1}^N \pi_i(e_1, \{\mathbf{1}\}) = \sum_{i=1}^N r_i e_i$ .*

306 *Proof* Since the initial moment  $X(0) = \{\mathbf{1}\}$  and  $e \in E_u(\delta)$ , the initial contribution matrix  
307  $X(t) = X(0)$  is maintained for all subsequent moments. It is straightforward to calculate the  
308 total payoff:

$$\begin{aligned}
U(e, \{\mathbf{1}\}) &= e_1 \left[ \frac{r_1}{\sigma} \sum_{k=1}^M (a_{2k}x_{1k} + a_{3k}x_{1k} + \cdots + a_{Nk}x_{1k} + x_{1k} - \frac{\sigma}{r_1}x_{1k}) + 1 \right] \\
&\quad + e_2 \left[ \frac{r_2}{\sigma} \sum_{k=1}^M (a_{1k}x_{2k} + a_{3k}x_{2k} + \cdots + a_{Nk}x_{2k} + x_{2k} - \frac{\sigma}{r_2}x_{2k}) + 1 \right] \\
&\quad + \dots \\
&\quad + e_N \left[ \frac{r_N}{\sigma} \sum_{k=1}^M (a_{1k}x_{Nk} + a_{2k}x_{Nk} + \cdots + a_{(N-1)k}x_{Nk} + x_{Nk} - \frac{\sigma}{r_N}x_{Nk}) + 1 \right] \\
&= e_1 \left[ \frac{r_1}{\sigma} \sum_{k=1}^M \left( \sum_{j=1}^N a_{jk} - \frac{\sigma}{r_1} \right) x_{1k} + 1 \right] + \cdots + e_N \left[ \frac{r_N}{\sigma} \sum_{k=1}^M \left( \sum_{j=1}^N a_{jk} - \frac{\sigma}{r_N} \right) x_{Nk} + 1 \right] \\
&= e_1 \left[ \frac{r_1}{\sigma} \left( \sigma - \frac{\sigma}{r_1} \right) \sum_{k=1}^M x_{1k} + 1 \right] + \cdots + e_N \left[ \frac{r_N}{\sigma} \left( \sigma - \frac{\sigma}{r_N} \right) \sum_{k=1}^M x_{Nk} + 1 \right] \\
&= \sum_{i=1}^N r_i e_i
\end{aligned} \tag{33}$$

Corollary 4 shows that different initial endowments within the full cooperation interval  $E_u(\delta)$  also have different total payoffs.

## 2.4 An example of a nonlinear symmetric payoff

We consider the example of a nonlinear symmetric public goods game with a payoff function  $u_i$  of the following form:

$$u_i(e, X) = c \max_{p,q \in N(i)} \left\{ \sum_{k=1}^M (x_{pk}e_p + x_{qk}e_q) \right\} + \frac{r}{\sigma} \sum_{k=1}^M a_{ik} \sum_{j=1}^N x_{jk}e_j - \left(1 - \sum_{k=1}^M x_{ik}\right)e_i, \quad (34)$$

where  $N(i)$  denotes the set of neighboring nodes of node  $i$  associated with hyperedges and  $c > 0$ . The nonlinear part means that the two highest actual values of endowments around node  $i$  will have an additional effect on it. Lemma 2.1 is satisfied by the condition that the payoff function  $u_i$  form is linear. We are considering a nonlinear payoff function and need to verify that  $u_i(e, \mathbf{1}) = u_i(e, \mathbf{1}')$ .

$$\begin{aligned} u_i(e, \{\mathbf{1}\}) &= c \max_{p,q \in N(i)} \left\{ \sum_{k=1}^M (x_{pk}e_p + x_{qk}e_q) \right\} + \frac{r}{\sigma} \sum_{k=1}^M a_{ik} \sum_{j=1}^N x_{jk}e_j - \left(1 - \sum_{k=1}^M x_{ik}\right)e_i \\ &= c \max_{p,q \in N(i)} \{e_p + e_q\} + \frac{r}{\sigma} \sum_{k=1}^M a_{ik} \sum_{j \neq i}^N x_{jk}e_j + \frac{e_i r_i}{\sigma} \sum_{k=1}^M x_{ik} = u_i(e, \{\mathbf{1}'\}). \end{aligned} \quad (35)$$

Here it can also be extended to consider a nonlinear asymmetric payoff function, whose nonlinear part is denoted as  $\max_{p,q \in N(i)} \left\{ \sum_{k=1}^M (r_p x_{pk}e_p + r_q x_{qk}e_q) \right\}$ . It still satisfies the condition that  $u_i(e, \{\mathbf{1}\}) = u_i(e, \{\mathbf{1}'\})$ . We verify the parameter conditions the three properties satisfy for a nonlinear payoff function of the form Eq.(34).

1.(PE) property satisfies the condition:

$$\begin{aligned} u_i(e, X) &= c \max_{p,q \in N(i)} \left\{ \sum_{k=1}^M (x_{pk}e_p + x_{qk}e_q) \right\} + \sum_{k=1}^M \frac{a_{ik}}{\sigma} \sum_{j=1}^N r x_{jk}e_j + \left(1 - \sum_{k=1}^M x_{ik}\right)e_i \\ &= c \max_{p,q \in N(i)} \left\{ \sum_{k=1}^M (x_{pk}e_p + x_{qk}e_q) \right\} + \frac{r}{\sigma} \sum_{k=1}^M a_{ik} \sum_{j \neq i}^N x_{jk}e_j + \frac{r}{\sigma} \sum_{k=1}^M x_{ik}e_i + \left(1 - \sum_{k=1}^M x_{ik}\right)e_i. \end{aligned} \quad (36)$$

The expression shows that we need to make  $r > 0$  to satisfy the condition.

326 **2.(IF)** property satisfies the condition:

$$\begin{aligned}
u_i(e, X) &= c \max_{p,q \in N(i)} \left\{ \sum_{k=1}^M (x_{pk}e_p + x_{qk}e_q) \right\} + \sum_{k=1}^M \frac{a_{ik}}{\sigma} \sum_{j=1}^N r x_{jk}e_j + (1 - \sum_{k=1}^M x_{ik})e_i \\
&= c \max_{p,q \in N(i)} \left\{ \sum_{k=1}^M (x_{pk}e_p + x_{qk}e_q) \right\} + \frac{r}{\sigma} \sum_{k=1}^M a_{ik} \sum_{j \neq i}^N x_{jk}e_j + \frac{r}{\sigma} \sum_{k=1}^M x_{ik}e_i + (1 - \sum_{k=1}^M x_{ik})e_i \\
&= c \max_{p,q \in N(i)} \left\{ \sum_{k=1}^M (x_{pk}e_p + x_{qk}e_q) \right\} + \frac{r}{\sigma} \sum_{k=1}^M a_{ik} \sum_{j \neq i}^N x_{jk}e_j + \sum_{k=1}^M \left( \frac{r}{\sigma} - 1 \right) x_{ik}e_i + e_i.
\end{aligned} \tag{37}$$

327 The expression shows that we need to make  $r < \sigma$  to satisfy the condition.

328 **3.(OC)** property satisfies the condition:

$$\begin{aligned}
U(e, X) &= \sum_{i=1}^N u_i(e, X) = \sum_{i=1}^N \left[ c \max_{p,q \in N(i)} \left\{ \sum_{k=1}^M (x_{pk}e_p + x_{qk}e_q) \right\} + \sum_{k=1}^M \frac{a_{ik}}{\sigma} \sum_{j=1}^N r x_{jk}e_j + (1 - \sum_{k=1}^M x_{ik})e_i \right] \\
&= e_1 \left[ \frac{r}{\sigma} \sum_{k=1}^M (a_{2k}x_{1k} + a_{3k}x_{1k} + \cdots + a_{Nk}x_{1k} + x_{1k} - \frac{\sigma}{r}x_{1k}) + 1 \right] \\
&\quad + e_2 \left[ \frac{r}{\sigma} \sum_{k=1}^M (a_{1k}x_{2k} + a_{3k}x_{2k} + \cdots + a_{Nk}x_{2k} + x_{2k} - \frac{\sigma}{r}x_{2k}) + 1 \right] \\
&\quad + \dots \\
&\quad + e_N \left[ \frac{r}{\sigma} \sum_{k=1}^M (a_{1k}x_{Nk} + a_{2k}x_{Nk} + \cdots + a_{(N-1)k}x_{Nk} + x_{Nk} - \frac{\sigma}{r}x_{Nk}) + 1 \right] \\
&\quad + c \sum_{i=1}^N \max_{p,q \in N(i)} \left\{ \sum_{k=1}^M (x_{pk}e_p + x_{qk}e_q) \right\}.
\end{aligned} \tag{38}$$

329 The expression shows that we need to make  $\sum_{j=1}^N a_{jk} > \frac{\sigma}{r}$  with  $\forall k$  to satisfy the condition.

330 Where  $\sum_{j=1}^N a_{jk} = \sigma$ , the property **(OC)** is satisfied as long as there is  $r > 1$ .

331 In summary, the nonlinear part is multiplied by a productivity factor  $c > 0$ , which leads to the  
332 satisfaction of the three property principle parameters  $r$  and linear symmetric payoff function  
333 consistent with  $1 < r < \sigma$ . Next, we discuss the conditions satisfied by the fully cooperative  
334 feasible interval of the nonlinear symmetric payoff function.

335 **Theorem 2.3** *The payoff function of a public goods game is given by Eq. (34). For a contri-*  
336 *bution matrix  $X$  and productivity coefficient  $1 < r < \sigma$ ,  $e \in E_u(\delta)$  holds if the continuation*  
337 *probability  $\delta \geq \frac{(\sigma-r)e_i}{\sigma c \max_{p,q \in N(i)} \{e_p+e_q\} + r \sum_{k=1}^M a_{ik} \sum_{j \neq i}^N x_{jk}e_j}$  with  $\forall i$ .*

338 *Proof* According to Lemma 2.1, we calculate the 3 payoff functions.

$$\begin{aligned}
u_i(\mathbf{e}, \{\mathbf{1}_{-i}\}) &= c \max_{p,q \in N(i)} \{e_p + e_q\} + \frac{r}{\sigma} \sum_{k=1}^M a_{ik} \sum_{j \neq i}^N x_{jk} e_j + e_i, \\
u_i(\mathbf{e}, O) &= e_i, \\
u_i(\mathbf{e}, \{\mathbf{1}\}) &= c \max_{p,q \in N(i)} \{e_p + e_q\} + \frac{r}{\sigma} \sum_{k=1}^M a_{ik} \sum_{j \neq i}^N x_{jk} e_j + \frac{r}{\sigma} e_i.
\end{aligned} \tag{39}$$

339 Applying Lemma 2.1, we derive sufficient conditions under which the endowment vector  $\mathbf{e}$  lies  
340 within the full cooperation feasible set  $E_u(\delta)$ , as follows:

$$\begin{aligned}
&\delta(u_i(\mathbf{e}, \{\mathbf{1}_{-i}\}) - u_i(\mathbf{e}, O)) \geq u_i(\mathbf{e}, \{\mathbf{1}_{-i}\}) - u_i(\mathbf{e}, \{\mathbf{1}\}) \\
\Rightarrow &\delta(c \max_{p,q \in N(i)} \{e_p + e_q\} + \frac{r}{\sigma} \sum_{k=1}^M a_{ik} \sum_{j \neq i}^N x_{jk} e_j) \geq (1 - \frac{r}{\sigma}) e_i \\
\Rightarrow &\delta \geq \frac{(\sigma - r) e_i}{\sigma c \max_{p,q \in N(i)} \{e_p + e_q\} + r \sum_{k=1}^M a_{ik} \sum_{j \neq i}^N x_{jk} e_j},
\end{aligned} \tag{40}$$

341 where it is required that inequality (40) holds for all players  $i$  with  $e_i > 0$ .  $\square$

342 Theorem 2.3 shows that the nonlinear part of the payoff function affects the feasible interval of  
343 full cooperation mainly in the distribution of endowment inequality. When two of the remaining  
344 nodes in the hyperedge associated with a node have relatively high endowments, it gives the  
345 node a higher probability of full cooperation. This is because the value of the nonlinear part  
346  $\max_{p,q \in N(i)} \{e_p + e_q\}$  will be relatively larger, making the conditions for the continuation probability  
347  $\delta$  to be satisfied relatively weaker.

348 **Corollary 5** *There exists a nonlinear symmetric public goods game function  $u$  such that  $E_u(\delta) \neq$*   
349  *$\emptyset$ , but  $\mathbf{e} = (\frac{1}{N}, \frac{1}{N}, \dots, \frac{1}{N}) \neq E_u(\delta)$ .*

350 We consider the example in Corollary 1. Consider a set of nonlinear symmetric payoff functions:

$$\begin{aligned}
u_1(\mathbf{e}, X) &= \frac{r}{3}(x_{11}e_1 + x_{21}e_2 + x_{31}e_3) + (1 - x_{11})e_1 + c((x_{21} + x_{22})e_2 + (x_{31} + x_{32})e_3), \\
u_2(\mathbf{e}, X) &= \frac{r}{3}(x_{11}e_1 + x_{21}e_2 + x_{31}e_3 + x_{22}e_2 + x_{32}e_3 + x_{42}e_4) + (1 - x_{21} - x_{22})e_2 + c \max_{p,q \in N(2)} \{e_p + e_q\}, \\
u_3(\mathbf{e}, X) &= \frac{r}{3}(x_{11}e_1 + x_{21}e_2 + x_{31}e_3 + x_{22}e_2 + x_{32}e_3 + x_{42}e_4) + (1 - x_{31} - x_{32})e_3 + c \max_{p,q \in N(3)} \{e_p + e_q\}, \\
u_4(\mathbf{e}, X) &= \frac{r}{3}(x_{22}e_2 + x_{32}e_3 + x_{42}e_4) + (1 - x_{42})e_4 + c((x_{21} + x_{22})e_2 + (x_{31} + x_{32})e_3).
\end{aligned} \tag{41}$$

351 Let  $x_{11} = 1, x_{21} = \frac{1}{3}, x_{22} = \frac{2}{3}, x_{31} = \frac{2}{3}, x_{32} = \frac{1}{3}, x_{42} = 1$ . Then for equal endowments

352  $e = (\frac{1}{4}, \frac{1}{4}, \frac{1}{4}, \frac{1}{4})$ ,  $\delta$  needs to satisfy the following condition:

$$\begin{aligned}
\delta_1 &\geq \frac{(3-r)\frac{1}{4}}{3c\frac{1}{2} + r(\frac{1}{3}\frac{1}{4} + \frac{2}{3}\frac{1}{4})} = \frac{3-r}{6c+r}, \\
\delta_2 &\geq \frac{(3-r)\frac{1}{4}}{3c\frac{1}{2} + r(1\frac{1}{4} + 1\frac{1}{4} + 1\frac{1}{4})} = \frac{3-r}{6c+3r} \\
\delta_3 &\geq \frac{(3-r)\frac{1}{4}}{3c\frac{1}{2} + r(1\frac{1}{4} + 1\frac{1}{4} + 1\frac{1}{4})} = \frac{3-r}{6c+3r}, \\
\delta_4 &\geq \frac{(3-r)\frac{1}{4}}{3c\frac{1}{2} + r(\frac{2}{3}\frac{1}{4} + \frac{1}{3}\frac{1}{4})} = \frac{3-r}{6c+r}.
\end{aligned} \tag{42}$$

353 Thus it is only necessary to make  $\delta \geq \frac{3-r}{6c+r}$  so that equal distribution is feasible for full coop-  
354 eration. In the following, we apply a perturbation to the equal endowments and the perturbed  
355 endowments  $e' = (\frac{1}{4} - \epsilon, \frac{1}{4} + 2\epsilon, \frac{1}{4} - \epsilon, \frac{1}{4})$ . Below we calculate the  $\delta$  conditions it has to satisfy:

$$\begin{aligned}
\delta_1 &\geq \frac{(3-r)(\frac{1}{4} - \epsilon)}{3c(\frac{1}{2} + \epsilon) + r(\frac{1}{3}(\frac{1}{4} + 2\epsilon) + \frac{2}{3}(\frac{1}{4} - \epsilon))} = \frac{(3-r)(1-4\epsilon)}{6c+8c\epsilon+r}, \\
\delta_2 &\geq \frac{(3-r)(\frac{1}{4} + 2\epsilon)}{3c(\frac{1}{2} - \epsilon) + r(\frac{1}{4} - \epsilon + \frac{1}{4} - \epsilon + \frac{1}{4})}, \\
\delta_3 &\geq \frac{(3-r)(\frac{1}{4} - \epsilon)}{2c(\frac{1}{2} + 2\epsilon) + r(\frac{1}{4} - \epsilon + \frac{1}{4} + 2\epsilon + \frac{1}{4})}, \\
\delta_4 &\geq \frac{(3-r)\frac{1}{4}}{3c(\frac{1}{2} + \epsilon) + r(\frac{2}{3}(\frac{1}{4} + 2\epsilon) + \frac{1}{3}(\frac{1}{4} - \epsilon))} = \frac{(3-r)}{6c+8c\epsilon+r+4r\epsilon}.
\end{aligned} \tag{43}$$

356 The perturbed endowments only need to satisfy  $\delta \geq \max\{\frac{(3-r)(1-4\epsilon)}{6c+8c\epsilon+r}, \frac{(3-r)}{6c+8c\epsilon+r+4r\epsilon}\}$  to make  
357 it feasible for full cooperation. Comparing the two values, we find that whenever we take  
358  $\delta \in [\max\{\frac{(3-r)(1-4\epsilon)}{6c+8c\epsilon+r}, \frac{(3-r)}{6c+8c\epsilon+r+4r\epsilon}\}, \frac{3-r}{6c+r}]$ , we make the equal endowments not feasible for full  
359 cooperation and will still have feasible intervals of full cooperation.

360 **Corollary 6** *The payoff function  $u$  of the public goods game under any nonlinear symmetric*  
361 *payoff function satisfies  $\forall e \in E_u(\delta)$  and  $X(0) = \{\mathbf{1}\}$ , we can get  $\sum_{i=1}^N \pi_i(e_1, \{\mathbf{1}\}) = r +$*   
362  *$c \sum_{i=1}^N \max_{p,q \in N(i)} \{e_p + e_q\}$ .*

363 *Proof* Since the initial moment  $X(0) = \{\mathbf{1}\}$  and  $e \in E_u(\delta)$ , the initial contribution matrix  
364  $X(t) = X(0)$  is maintained for all subsequent moments. It is straightforward to calculate the

total payoff:

$$\begin{aligned}
U(\mathbf{e}, \{\mathbf{1}\}) &= e_1 \left[ \frac{r_1}{\sigma} \sum_{k=1}^M (a_{2k}x_{1k} + a_{3k}x_{1k} + \cdots + a_{Nk}x_{1k} + x_{1k} - \frac{\sigma}{r_1}x_{1k}) + 1 \right] \\
&+ e_2 \left[ \frac{r_2}{\sigma} \sum_{k=1}^M (a_{1k}x_{2k} + a_{3k}x_{2k} + \cdots + a_{Nk}x_{2k} + x_{2k} - \frac{\sigma}{r_2}x_{2k}) + 1 \right] \\
&+ \dots \\
&+ e_N \left[ \frac{r_N}{\sigma} \sum_{k=1}^M (a_{1k}x_{Nk} + a_{2k}x_{Nk} + \cdots + a_{(N-1)k}x_{Nk} + x_{Nk} - \frac{\sigma}{r_N}x_{Nk}) + 1 \right] \\
&+ c \sum_{i=1}^N \max_{p,q \in N(i)} \left\{ \sum_{k=1}^M (x_{pk}e_p + x_{qk}e_q) \right\} \\
&= r + c \sum_{i=1}^N \max_{p,q \in N(i)} \{e_p + e_q\}.
\end{aligned} \tag{44}$$

□

Corollary 6 suggests that different endowment distributions in the fully cooperative interval  $E_u(\delta)$  will have different total payoffs.

## 2.5 Maximally cooperative endowment distribution

This subsection will present a distribution of endowments for the most favorable cooperation. First, the smallest continuation probability of full cooperation is defined. When the continuation probability is large enough, there is always a feasible interval for full cooperation. By Lemma 2.2, the feasible interval of full cooperation will gradually become smaller as  $\delta$  becomes smaller. There will be a critical smallest continuation probability, which we define as

$$\delta_u^* = \inf\{\delta \in [0, 1] | E_u(\delta) \neq \emptyset\}. \tag{45}$$

The maximal cooperative endowment distribution concept can be defined with the above definition of minimal continuation probability.

**Definition 1** *Given a public goods game with payoff function  $u$ , a endowment distribution  $\mathbf{e}^* = \{e_1^*, \dots, e_N^*\}$  is the maximal cooperative endowment distribution satisfying  $\mathbf{e}^* \in E_u(\delta_u^*)$ .*

The above definition combined with Lemma 2.2 shows that the maximal cooperative endowment distribution  $\mathbf{e}^*$  must be in the fully cooperative feasible interval whenever the continuation probability  $\delta \geq \delta^*$ , due to  $E_u(\delta^*) \subset E_u(\delta)$ . But we want to find this smallest continuation prob-

ability as an optimization problem, and we consider a simple problem in our research model, the two-player multiple public goods game problem.

**Theorem 2.4** Consider a linear asymmetric payoff function  $u$  for a two-player dual public goods game as

$$\begin{aligned} u_1 &= \frac{1}{2}(r_1x_{11}e_1 + r_1x_{12}e_1 + r_2x_{21}e_2 + r_2x_{22}e_2) + (1 - x_{11} - x_{12})e_1, \\ u_2 &= \frac{1}{2}(r_1x_{11}e_1 + r_1x_{12}e_1 + r_2x_{21}e_2 + r_2x_{22}e_2) + (1 - x_{21} - x_{22})e_2. \end{aligned} \quad (46)$$

The smallest continuation probability  $\delta_u^*$  and the maximal cooperative endowment distribution  $\mathbf{e}^* = (e_1^*, e_2^*)$  are given by

$$\delta_u^* = \sqrt{\frac{(2-r_1)(2-r_2)}{r_1r_2}} \quad \text{and} \quad \frac{e_1^*}{e_2^*} = \sqrt{\frac{(2-r_2)r_2}{(2-r_1)r_1}}. \quad (47)$$

*Proof* For any continuation probability  $\delta$  and endowment distribution  $\mathbf{e} = (e_1, e_2)$ ,  $\mathbf{e} \in E_u(\delta)$  if and only if

$$\begin{aligned} \delta &\geq \frac{(2-r_1)e_1}{r_2e_2}, \\ \delta &\geq \frac{(2-r_2)e_2}{r_1e_1}. \end{aligned} \quad (48)$$

The interval range of  $\frac{e_1}{e_2}$  is obtained by transforming the inequality

$$\frac{2-r_2}{\delta r_1} \leq \frac{e_1}{e_2} \leq \frac{\delta r_2}{2-r_1}. \quad (49)$$

The sufficient condition for  $\mathbf{e} \in E_u(\delta)$  to exist is  $\frac{2-r_2}{\delta r_1} \leq \frac{\delta r_2}{2-r_1}$ . When this condition is satisfied,  $\delta \geq \delta_u^*$ . A critical condition for the lower bound is simply to let both sides of the inequality be taken equally. We can get  $\delta_u^* = \sqrt{\frac{(2-r_1)(2-r_2)}{r_1r_2}}$ , and also  $\frac{e_1^*}{e_2^*} = \sqrt{\frac{(2-r_2)r_2}{(2-r_1)r_1}}$ .  $\square$

The result in Theorem 2.4 eventually degenerates into a linear asymmetric model result for the two-person public goods game [5].

## 2.6 Smallest continuation probability for homogeneous hypergraphs

In the following discussion, we address the issue of smallest continuation probability within the framework of homogeneous hypergraph. The term “homogeneous” refers to a broad generalization encompassing three distinct aspects: the structure of the hypergraph, the productivity

of the individuals, and the configuration of the contribution matrix. Our demonstration of the smallest continuation probability establishes that all three sub-properties must uniformly satisfy this homogeneity criterion.

We postulate that the average hyperdegree of the network is  $k$  (i.e., each individual is connected to  $k$  hyperedges). The productivity expectations for all individuals are symmetrical. In the contribution matrix  $X$ , any non-zero element is valued at  $\frac{1}{k}$ . Provided these three homogeneity conditions are met, the following theorem can be derived.

**Theorem 2.5** Consider a linear symmetric payoff function  $u$  in a public goods game involving  $\sigma$  players, where each player participates in  $k$  public goods games. All players contribute a proportion  $\frac{1}{k}$  to each of the  $k$  public goods games in which they are involved. The smallest continuation probability  $\delta_u^*$  and the continuation probability for equal endowments  $\delta_{\text{equal}}^*$  are identical, given by:

$$\delta_u^* = \delta_{\text{equal}}^* = \frac{\sigma - r}{r(\sigma - 1)}. \quad (50)$$

*Proof* First, we compute the continuation probability  $\delta_{\text{equal}}^*$  under equal endowment, based on the linear symmetric case. The calculation is as follows:

$$\delta_{\text{equal}}^* = \frac{(\sigma - r)e_i}{r \sum_{k=1}^M a_{ik} \sum_{j \neq i}^N x_{jk} e_j} = \frac{(\sigma - r) \frac{1}{N}}{rk \frac{1}{k} (\sigma - 1) \frac{1}{N}} = \frac{\sigma - r}{r(\sigma - 1)}. \quad (51)$$

In the following, we aim to demonstrate that for any perturbation from the equal endowments scenario, there exists at least one node  $i$  where  $\delta_i^*$  exceeds  $\delta_{\text{equal}}^*$ . Consequently, no perturbation can reduce  $\delta_u^*$  below  $\delta_{\text{equal}}^*$ , establishing it as the smallest continuation probability. We consider a

perturbed endowment vector  $\mathbf{e}$  defined as  $\left\{ \underbrace{\frac{1}{N} + \epsilon_{i_1}, \frac{1}{N} + \epsilon_{i_2}, \dots, \frac{1}{N} + \epsilon_{i_m}}_m, \underbrace{\frac{1}{N} - \epsilon_{i_{m+1}}, \dots, \frac{1}{N} - \epsilon_{i_N}}_{N-m} \right\}$ ,

consisting of  $m$  positive and  $N-m$  negative perturbations. These perturbations satisfy  $\sum_{k=1}^m \epsilon_{i_k} = \sum_{k=m+1}^N \epsilon_{i_k}$ , where  $\epsilon_{i_k} \in [0, \frac{1}{N}]$  for all  $k \in [m+1, N]$  and  $\epsilon_{i_k} \in [0, \frac{N-m}{N}]$  for all  $k \in [1, m]$ . The sequence  $i_1$  to  $i_N$  represents any permutation of 1 through  $N$ . Next, we calculate  $\delta_{i_m}^*$  for

the initial  $m$  positive perturbations:

$$\begin{aligned}
\delta_{i_1}^* &= \frac{k(\sigma - r) \left[ \frac{1}{N} + \epsilon_{i_1} \right]}{r \left[ \sum_{j \neq \{i_1, \dots, i_m\}}^N P_j^{(i_1)} \left( \frac{1}{N} - \epsilon_j \right) + \sum_{j=\{i_2, \dots, i_m\}} P_j^{(i_1)} \left( \frac{1}{N} + \epsilon_j \right) \right]} \\
&= \frac{k(\sigma - r) \left[ \frac{1}{N} + \epsilon_{i_1} \right]}{r \left[ k(\sigma - 1) \frac{1}{N} - \sum_{j \neq \{i_1, \dots, i_m\}}^N P_j^{(i_1)} \epsilon_j + \sum_{j=\{i_2, \dots, i_m\}} P_j^{(i_1)} \epsilon_j \right]} \\
&= \frac{(\sigma - r)}{r(\sigma - 1)} + \frac{\frac{\sigma - r}{r(\sigma - 1)} N r \left[ \sum_{j \neq \{i_1, \dots, i_m\}}^N P_j^{(i_1)} \epsilon_j - \sum_{j=\{i_2, \dots, i_m\}} P_j^{(i_1)} \epsilon_j \right] + k(\sigma - r) N \epsilon_{i_1}}{k r(\sigma - 1) - N r \left[ \sum_{j \neq \{i_1, \dots, i_m\}}^N P_j^{(i_1)} \epsilon_j - \sum_{j=\{i_2, \dots, i_m\}} P_j^{(i_1)} \epsilon_j \right]}.
\end{aligned} \tag{52}$$

Here,  $P_j^{(i_1)}$  denotes the number of nodes  $j$  associated with node  $i_1$  through hyperedges, which is an unspecified quantity. Nevertheless, it is known that the sum of these associations for nodes not included in the set  $\{i_1, \dots, i_m\}$  and those within the set  $\{i_2, \dots, i_m\}$  totals  $k(\sigma - 1)$ . We can then express this relationship as follows:

$$\sum_{j \neq \{i_1, \dots, i_m\}}^N P_j^{(i_1)} \epsilon_j \leq \frac{1}{N} \sum_{j \neq \{i_1, \dots, i_m\}}^N P_j^{(i_1)} \leq \frac{1}{N} k(\sigma - 1). \tag{53}$$

Thus, it must hold that

$$\begin{aligned}
&k r(\sigma - 1) - N r \left[ \sum_{j \neq \{i_1, \dots, i_m\}}^N P_j^{(i_1)} \epsilon_j - \sum_{j=\{i_2, \dots, i_m\}} P_j^{(i_1)} \epsilon_j \right] \\
&\geq k r(\sigma - 1) - N r \sum_{j \neq \{i_1, \dots, i_m\}}^N P_j^{(i_1)} \epsilon_j \\
&\geq k r(\sigma - 1) - N r \frac{1}{N} k(\sigma - 1) \\
&\geq 0.
\end{aligned} \tag{54}$$

We have proven that the denominator in Eq. (52) is non-negative. Now, it remains to demonstrate that the numerator is also positive. We enumerate the continuation probabilities for the remaining  $m - 1$  perturbations,  $\delta_{i_m}^*$ , as follows:

$$\begin{cases} \delta_{i_1}^* = \frac{(\sigma - r)}{r(\sigma - 1)} + \frac{\frac{\sigma - r}{r(\sigma - 1)} N r \left[ \sum_{j \neq \{i_1, \dots, i_m\}}^N P_j^{(i_1)} \epsilon_j - \sum_{j=\{i_2, \dots, i_m\}} P_j^{(i_1)} \epsilon_j \right] + k(\sigma - r) N \epsilon_{i_1}}{k r(\sigma - 1) - N r \left[ \sum_{j \neq \{i_1, \dots, i_m\}}^N P_j^{(i_1)} \epsilon_j - \sum_{j=\{i_2, \dots, i_m\}} P_j^{(i_1)} \epsilon_j \right]}, \\ \vdots \\ \delta_{i_m}^* = \frac{(\sigma - r)}{r(\sigma - 1)} + \frac{\frac{\sigma - r}{r(\sigma - 1)} N r \left[ \sum_{j \neq \{i_1, \dots, i_m\}}^N P_j^{(i_m)} \epsilon_j - \sum_{j=\{i_1, \dots, i_{m-1}\}} P_j^{(i_m)} \epsilon_j \right] + k(\sigma - r) N \epsilon_{i_m}}{k r(\sigma - 1) - N r \left[ \sum_{j \neq \{i_1, \dots, i_m\}}^N P_j^{(i_m)} \epsilon_j - \sum_{j=\{i_1, \dots, i_{m-1}\}} P_j^{(i_m)} \epsilon_j \right]}. \end{cases} \tag{55}$$

432 We employ a counterfactual hypothesis, assuming that if all the numerators in these  $m$  equations  
 433 are negative, then their sum must also be negative. Proving that the total is positive confirms  
 434 the existence of a positive term. First, we sum all the numerators, hypothesizing that they are  
 435 negative:

$$\sum_{q=1}^m \left\{ \frac{\sigma - r}{r(\sigma - 1)} Nr \left[ \sum_{j \neq \{i_1, \dots, i_m\}}^N P_j^{(i_q)} \epsilon_j - \sum_{j = \{i_1, \dots, i_{q-1}, i_{q+1}, \dots, i_m\}} P_j^{(i_q)} \epsilon_j \right] + k(\sigma - r)N\epsilon_{i_q} \right\} < 0. \quad (56)$$

436 Next, we extract the coefficients for one of the terms,  $\epsilon_{i_1}$ :

$$\begin{aligned} & \frac{\sigma - r}{r(\sigma - 1)} Nr \left[ -P_{i_1}^{(i_2)} \epsilon_{i_1} - P_{i_1}^{(i_3)} \epsilon_{i_1} - \dots - P_{i_1}^{(i_m)} \epsilon_{i_1} \right] + k(\sigma - r)N\epsilon_{i_1} \\ &= \left\{ -\frac{N(\sigma - r)}{\sigma - 1} \sum_{k=1}^m P_{i_1}^{(i_k)} + k(\sigma - r)N \right\} \epsilon_{i_1}. \end{aligned} \quad (57)$$

437 Given the hypergraph structure and the assumption that the hyperdegree is  $k$ , player  $i_1$  can be  
 438 associated with at most  $k(\sigma - 1)$  nodes. Therefore:

$$k(\sigma - r)N - \frac{N(\sigma - r)}{\sigma - 1} \sum_{k=1}^m P_{i_1}^{(i_k)} \geq k(\sigma - r)N - \frac{N(\sigma - r)}{\sigma - 1} k(\sigma - 1) \geq 0 \quad (58)$$

439 This inequality establishes that the sum of the  $m$  numerators is greater than zero. Thus, at least  
 440 one  $\delta_{i_m}^*$  must be greater than  $\delta_{\text{equal}}^*$ . Any perturbation will increase  $\delta_u^*$ , confirming that equal  
 441 endowments represent the smallest continuation probability.  $\square$

442 Theorem 2.5 offers a broad generalization, illustrating that within any homogeneous hypergraph,  
 443 the smallest continuation probability is determined solely by the productivity and the dimensions  
 444 of the hyperedges, rather than the average number of hyperedges. From Theorem 2.5, we derive  
 445 the following corollary.

446 **Corollary 7** *In any homogeneous hypergraph, the smallest continuation probability monotonically decreases with respect to the productivity factor  $r$  and monotonically increases with respect to the hyperedge dimension  $\sigma$ .*

449 *Proof* Define the functions  $f(r) = \frac{\sigma - r}{r(\sigma - 1)}$  and  $g(\sigma) = \frac{\sigma - r}{r(\sigma - 1)}$ . We calculate the derivatives of  
 450  $f(r)$  and  $g(\sigma)$  with respect to  $r$  and  $\sigma$  respectively:

$$\begin{aligned} f'(r) &= \frac{-\sigma^2 + \sigma}{(r\sigma - r)^2}, \\ g'(\sigma) &= \frac{r(r - 1)}{(r\sigma - r)^2}. \end{aligned} \quad (59)$$

451 Given the conditions  $1 < r < \sigma$  and  $\sigma \geq 2$ , it follows that  $f'(r) < 0$  and  $g'(\sigma) > 0$ , indicating  
452 that  $f(r)$  is monotonically decreasing and  $g(\sigma)$  is monotonically increasing. Evaluating the  
453 limits of these functions, we find  $\lim_{r \rightarrow 1^+} f(r) = 1$ ,  $\lim_{r \rightarrow \sigma^-} f(r) = 0$ , and  $\lim_{\sigma \rightarrow \infty} g(\sigma) = \frac{1}{r}$ .  
454  $\square$

### 3 Evolutionary Process Analysis

In the previous section, we concentrated on the interval range of  $e$  that remains feasible for full cooperation in the initial state  $X(0) = \{1\}$ . In this subsection, we investigate the outcomes of the system's evolution before the player reaches a steady state.

#### 3.1 Strategy update process

In this subsection, the strategy update refers to the update of the contribution matrix  $X(t)$ . We employ an introspection dynamic model [5, 6] for strategy updating. Specifically, node  $i$  is selected with equal random probability and the last round of payoff  $\pi_i^{old}$  is computed. Subsequently, a strategy is chosen from the remaining strategy space with equal random probability, and the new payoff  $\pi_i^{new}$  is computed. Note that the dimension of the strategy space of node  $i$  is  $s_i$ . The transition probabilities of the new and old strategies are:

$$P(\pi_i^{old} \rightarrow \pi_i^{new}) = \frac{1}{N} \frac{1}{s_i - 1} \frac{1}{1 + e^{-\beta(\pi_i^{new} - \pi_i^{old})}}. \quad (60)$$

The parameter  $\beta$  reflects the strength of selection. In the case of  $\beta = 0$ , the probability  $P = \frac{1}{2}$  indicates that the strategy shift is randomized. In the case of strong selection  $\beta \rightarrow +\infty$ , the player will adopt the new strategy if the new strategy yields a higher payoff than the old one. We choose this update strategy over the traditional pairwise comparison or DB update for two reasons. First, the number of hyperedges each node is involved in is not necessarily the same. After comparing the payoffs, it is not possible to exactly replicate the elements in the contribution matrix  $X(t)$  when performing the strategy update. Second, if it enters an absorbing state at some point, it is impossible to evolve out of it. However, these two drawbacks can be overcome with the introspection dynamic model. Additionally, we consider the update process as a Moran [7] process, meaning that only one node performs the strategy update at each step.

#### 3.2 Memory-one strategy

In the analysis of the memory-one strategy, we make two assumptions. First, we assume that the strategy space is limited in each round. Specifically, each contribution matrix element  $X_{ij}(t)$  can only choose from a limited number of strategies. The simplest of these is to consider that each row has at most one  $X_{ij}(t) = 1$ , and the rest are all 0. This implies that nodes can only choose to contribute all their endowments to a particular hyperedge or retain all of their endowments. Second, each player decides the next round strategy based solely on the previous round's result, independent of all previous results.

484 We consider the simplest hypergraph model we discussed earlier, where nodes 1, 2, and 3 to-  
 485 gether form a hyperedge  $j_1$  and nodes 2, 3, and 4 together form a hyperedge  $j_2$ . The contribution  
 486 matrix is such that at most one element is 1 and the rest are 0. At this point, the state space totals  
 487  $2 * 3 * 3 * 2 = 36$ . However, not every state has a transition probability, and it needs to be en-  
 488 sured that there is only one strategy change from one state to another. With the above definitions  
 489 and strategy update rules, we can obtain the transition probability matrix  $P = \{p_{ij}\} \in R^{36*36}$ .  
 490 Given an initial strategy distribution  $\mathbf{v}^0$ , we can calculate:

$$\mathbf{v} = (1 - \delta)\mathbf{v}^0(I - \delta P)^{-1}, \quad (61)$$

491 where  $I$  is the identity matrix. When  $\delta \rightarrow 1$ , the vector  $\mathbf{v}$  is close to the left eigenvector corre-  
 492 sponding to the 1 eigenvalue of the transition probability matrix  $P$ . Through the payoff vector  $\mathbf{u}$ ,  
 493 the obtained state vector  $\mathbf{v}$ , and the given endowment distribution  $\mathbf{e}$ , the total payoff  $\Pi$  (Extended  
 494 Data Fig.5) can be obtained as

$$\Pi = \sum_{i=1}^{36} v_i * u_i(\mathbf{e}, X). \quad (62)$$

495 Furthermore, we assume that players' decisions are noisy. For any round, there is a small proba-  
 496 bility  $\epsilon > 0$  that each player will have a memory error. For example, a player chose cooperation  
 497 in the previous round but remembered choosing defection. We note that the dimension of the  
 498 state space is  $b$ . For the elements of the transition probability matrix, we would have the follow-  
 499 ing re-representation:

$$p_{ij}^{error} = (1 - \epsilon)p_{ij} + \sum_{k \neq i}^b \frac{\epsilon}{b-1} p_{kj}. \quad (63)$$

500 We stipulate that memory errors are chosen with equal probability in the strategy space. This  
 501 setup ensures that the row sum of the transition probability matrix remains equal to 1.

$$\begin{aligned} \sum_{j=1}^b p_{ij}^{error} &= (1 - \epsilon) \sum_{j=1}^b p_{ij} + \frac{\epsilon}{b-1} \sum_{j=1}^b \sum_{k \neq i}^b p_{kj} \\ &= (1 - \epsilon) + \frac{\epsilon}{b-1} \sum_{k \neq i}^b \sum_{j=1}^b p_{kj} \\ &= (1 - \epsilon) + \frac{\epsilon}{b-1} \sum_{k \neq i}^b 1 \\ &= (1 - \epsilon) + \epsilon \\ &= 1. \end{aligned} \quad (64)$$

## References

- [1] K. Sigmund. *The Calculus of Selfishness*. Princeton University Press, 2010.
- [2] G. J. Mailath and L. Samuelson. *Repeated games and reputations*. Oxford University Press, 2006.
- [3] R. Selten. Reexamination of the perfectness concept for equilibrium points in extensive games. *Int. J. Game Theory*, 4: 25–55, 1975.
- [4] D. Fudenberg and J. Tirole. *Game Theory*. The MIT Press, 1998.
- [5] O. P. Hauser, C. Hilbe, K. Chatterjee, and M. A. Nowak. Social dilemmas among unequals. *Nature*, 572: 524–527, 2019.
- [6] H. Zhang. Errors can increase cooperation in finite populations. *Games Econ. Behav.*, 107: 203–219, 2018.
- [7] M. A. Nowak, A. Sasaki, C. Taylor, and D. Fudenberg. Emergence of cooperation and evolutionary stability in finite populations. *Nature*, 428: 646–650, 2004.
- [8] A. R. Benson, R. Abebe, et al. Simplicial closure and higher-order link prediction. *Proceedings of the National Academy of Sciences*, 2018.
- [9] J. H. Fowler. Connecting the Congress: A Study of Cosponsorship Networks. *Political Analysis*, 14(04): 456–487, 2006.
- [10] J. H. Fowler. Legislative cosponsorship networks in the US House and Senate. *Social Networks*, 28(4): 454–465, 2006.
- [11] H. Yin, A. R. Benson, J. Leskovec, and D. F. Gleich. “Local Higher-Order Graph Clustering”. *Proceedings of the 23rd ACM SIGKDD International Conference on Knowledge Discovery and Data Mining*. ACM Press, 2017.
- [12] J. Leskovec, J. Kleinberg, and C. Faloutsos. Graph evolution: Densification and shrinking diameters. *ACM Transactions on Knowledge Discovery from Data*, 1(1), 2007.
- [13] R. Mastrandrea, J. Fournet, and A. Barrat. Contact Patterns in a High School: A Comparison between Data Collected Using Wearable Sensors, Contact Diaries and Friendship Surveys. *PLOS ONE*, 10(9): e0136497, 2015.
- [14] J. Stehlé, N. Voirin, et al. High-Resolution Measurements of Face-to-Face Contact Patterns in a Primary School. *PLoS ONE*, 6(8): e23176, 2011.

| <b>ID in Fig. 7</b> | <b>Context</b>                     | <b>Reference</b> |
|---------------------|------------------------------------|------------------|
| DBLP                | co-authorship on DBLP papers       | [8]              |
| TMS                 | tags on math.stackexchange.com     | [8]              |
| NDC                 | substances making up drugs         | [8]              |
| DAWN                | drugs used by ER patients          | [8]              |
| CB                  | congresspersons cosponsoring bills | [8–10]           |
| EEu                 | email addresses on emails (full)   | [8, 11, 12]      |
| EEn                 | email addresses on emails (subset) | [8]              |
| CHS                 | high school contact groups         | [8, 13]          |
| CPS                 | primary school contact groups      | [8, 14]          |
| TAU                 | tags on askubuntu.com              | [8]              |

**Supplementary Table 1:** Summary of the real-world hypergraphs used in Fig. 7.

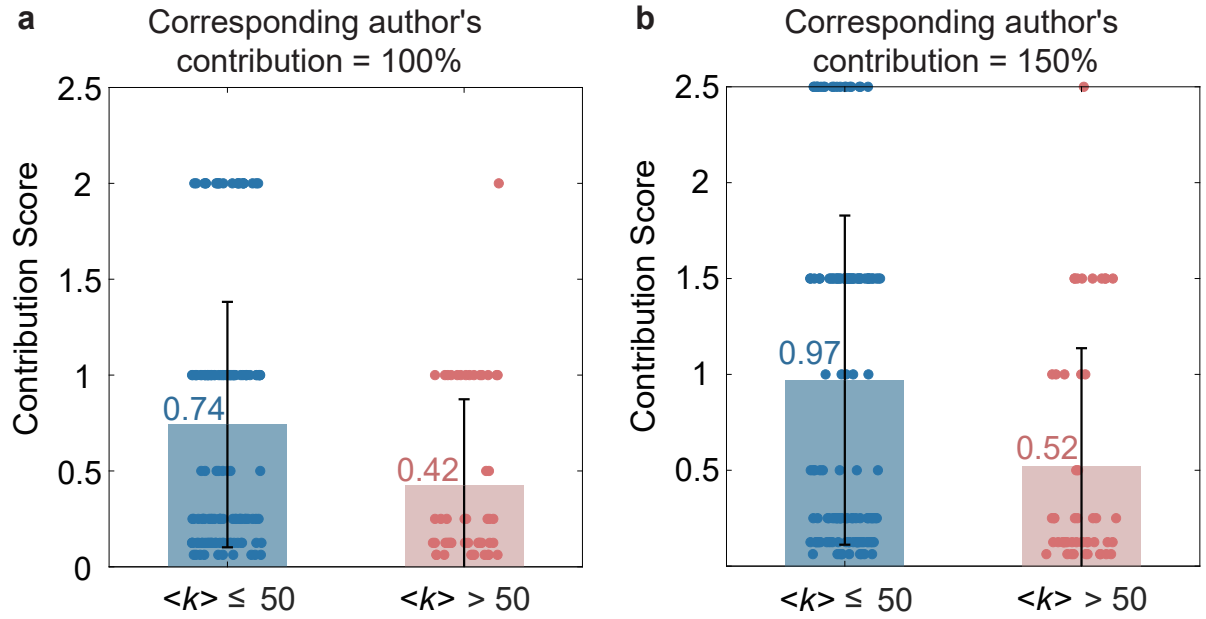

**Supplementary Fig. 1: Effect of corresponding author contribution.** In the main text (Fig. 7d), we examined the case where the corresponding author's contribution was set to 50%. In panels **a** and **b**, we varied the corresponding author's contribution to 100% and 150%, respectively. The results show that the level of corresponding author contribution does not affect the general pattern that higher hyperdegree researchers tend to contribute more to lower hyperdegree collaborators.
